# Supplementary material for: Efficacy and safety evaluation of black ginseng (Panax ginseng C.A. Mey.) extract (CJ EnerG): broad spectrum cytotoxic activity in human cancer cell lines and 28-day repeated oral toxicity study in Sprague-Dawley rats
Source: Springer Nature journal article supplement (doi:10.1186/s12906-022-03522-3), 2022-02-16
Supplement: MOESM1 [file 20138604]

Supplementary Table 1. Urinalysis of SD rats orally treated with black ginseng extract for 28 days

| Parameter              | Value       | Dose of black ginseng extract (mg/kg) |                 |                 |                 |                    |                 |                 |                 |
|------------------------|-------------|---------------------------------------|-----------------|-----------------|-----------------|--------------------|-----------------|-----------------|-----------------|
|                        |             | Male (n=5/group)                      |                 |                 |                 | Female (n=5/group) |                 |                 |                 |
|                        |             | 0                                     | 500             | 1000            | 2000            | 0                  | 500             | 1000            | 2000            |
| Specific gravity       |             | 1.025<br>±0.015                       | 1.029<br>±0.011 | 1.030<br>±0.007 | 1.033<br>±0.013 | 1.023<br>±0.018    | 1.026<br>±0.013 | 1.019<br>±0.006 | 1.025<br>±0.017 |
| Glucose (mg/dl)        | Negative    | 5/5                                   | 5/5             | 5/5             | 5/5             | 5/5                | 5/5             | 5/5             | 5/5             |
| Ketone                 | Negative    | 1/5                                   | 1/5             | 0/5             | 0/5             | 3/5                | 3/5             | 5/5             | 3/5             |
|                        | Trace       | 2/5                                   | 1/5             | 2/5             | 2/5             | 2/5                | 2/5             | 0/5             | 1/5             |
|                        | 15          | 2/5                                   | 3/5             | 3/5             | 1/5             | 0/5                | 0/5             | 0/5             | 1/5             |
|                        | 40          | 0/5                                   | 0/5             | 0/5             | 2/5             | 0/5                | 0/5             | 0/5             | 0/5             |
| pH                     | 6.0         | 0/5                                   | 0/5             | 0/5             | 0/5             | 1/5                | 0/5             | 0/5             | 0/5             |
|                        | 7.0         | 0/5                                   | 0/5             | 0/5             | 1/5             | 0/5                | 0/5             | 1/5             | 0/5             |
|                        | 7.5         | 0/5                                   | 0/5             | 0/5             | 0/5             | 0/5                | 1/5             | 0/5             | 0/5             |
|                        | 8.0         | 0/5                                   | 0/5             | 1/5             | 1/5             | 2/5                | 0/5             | 1/5             | 1/5             |
|                        | 8.5         | 4/5                                   | 5/5             | 4/5             | 3/5             | 2/5                | 3/5             | 2/5             | 3/5             |
|                        | 9.0         | 1/5                                   | 0/5             | 0/5             | 0/5             | 0/5                | 1/5             | 1/5             | 1/5             |
| Leukocytes             | Negative    | 4/5                                   | 3/5             | 4/5             | 1/5             | 5/5                | 5/5             | 4/5             | 4/5             |
|                        | Trace       | 1/5                                   | 2/5             | 1/5             | 4/5             | 0/5                | 0/5             | 1/5             | 1/5             |
| Nitrite                | Negative    | 5/5                                   | 5/5             | 4/5             | 5/5             | 5/5                | 5/5             | 5/5             | 5/5             |
|                        | Positive    | 0/5                                   | 0/5             | 1/5             | 0/5             | 0/5                | 0/5             | 0/5             | 0/5             |
| Protein (mg/dl)        | Negative    | 0/5                                   | 0/5             | 0/5             | 0/5             | 3/5                | 3/5             | 3/5             | 3/5             |
|                        | Trace       | 4/5                                   | 1/5             | 1/5             | 2/5             | 1/5                | 0/5             | 2/5             | 1/5             |
|                        | 30          | 0/5                                   | 4/5             | 4/5             | 2/5             | 1/5                | 1/5             | 0/5             | 1/5             |
|                        | 100         | 1/5                                   | 0/5             | 0/5             | 1/5             | 0/5                | 1/5             | 0/5             | 0/5             |
| Urobilinogen (E.U./dl) | 0.2         | 4/5                                   | 4/5             | 4/5             | 2/5             | 3/5                | 3/5             | 5/5             | 4/5             |
|                        | 1.0         | 0/5                                   | 1/5             | 1/5             | 3/5             | 2/5                | 2/5             | 0/5             | 1/5             |
|                        | 2.0         | 1/5                                   | 0/5             | 0/5             | 0/5             | 0/5                | 0/5             | 0/5             | 0/5             |
| Bilirubin              | Negative    | 5/5                                   | 5/5             | 5/5             | 5/5             | 5/5                | 5/5             | 5/5             | 5/5             |
| Blood                  | Negative    | 5/5                                   | 4/5             | 4/5             | 5/5             | 5/5                | 5/5             | 5/5             | 5/5             |
|                        | Trace-lysed | 0/5                                   | 1/5             | 1/5             | 0/5             | 0/5                | 0/5             | 0/5             | 0/5             |

Supplementary Table 2. Institutional historical data on the normal ranges of several parameters in Sprague-Dawley rats

| Item            | Unit  | Gender | Data (n=55, 2006~2018) |        |        |
|-----------------|-------|--------|------------------------|--------|--------|
|                 |       |        | Range                  | Min    | Max    |
| % Monocytes     | %     | Male   | 2.8 ± 1.5              | 0.8    | 6.5    |
| aPTT            | Sec   | Male   | 26.7 ± 9.0             | 14.1   | 46.3   |
| Creatinine*     | mg/dL | Male   | 0.5 ± 0.09             | 0.34   | 0.70   |
| GGT             | IU/L  | Female | 0.3 ± 0.48             | 0.0    | 1.0    |
| Liver           | g     | Female | 7.6 ± 1.0              | 5.0    | 10.3   |
| Pituitary gland | g     | Female | 0.015 ± 0.002          | 0.009  | 0.019  |
| Spleen          | g%    | Female | 0.24 ± 0.03            | 0.18   | 0.33   |
| Pituitary gland | g%    | Female | 0.0063 ± 0.0009        | 0.0037 | 0.0085 |

\*; n=45, 2008~2018

Supplementary Table 3. Gross findings in major organs from SD rats orally treated with black ginseng extract for 28 days

| Organ          | Findings      | Dose of black ginseng extract (mg/kg) |       |       |       |                     |       |       |      |
|----------------|---------------|---------------------------------------|-------|-------|-------|---------------------|-------|-------|------|
|                |               | Male (n=10/group)                     |       |       |       | Female (n=10/group) |       |       |      |
|                |               | 0                                     | 500   | 1000  | 2000  | 0                   | 500   | 1000  | 2000 |
| Lung           | Normal        | 8/10                                  | 9/10  | 10/10 | 9/10  | 9/10                | 10/10 | 9/10  | 9/10 |
|                | Discoloration | 0/10                                  | 0/10  | 0/10  | 0/10  | 1/10                | 0/10  | 0/10  | 1/10 |
|                | Spots         | 2/10                                  | 1/10  | 0/10  | 1/10  | 0/10                | 0/10  | 1/10  | 0/10 |
| Thymus         | Normal        | 10/10                                 | 10/10 | 10/10 | 10/10 | 10/10               | 10/10 | 8/10  | 9/10 |
|                | Discoloration | 0/10                                  | 0/10  | 0/10  | 0/10  | 0/10                | 0/10  | 2/10  | 1/10 |
| Clitoral gland | Normal        | -                                     | -     | -     | -     | 10/10               | 9/10  | 10/10 | 9/10 |
|                | Spots         | -                                     | -     | -     | -     | 0/10                | 1/10  | 0/10  | 1/10 |

Supplementary Table 4. Histopathological findings in major organs from SD rats orally treated with black ginseng extract for 28 days

| Organ                   | Findings                                      | Dose of black ginseng extract (mg/kg) |       |                     |       |
|-------------------------|-----------------------------------------------|---------------------------------------|-------|---------------------|-------|
|                         |                                               | Male (n=10/group)                     |       | Female (n=10/group) |       |
|                         |                                               | 0                                     | 2000  | 0                   | 2000  |
| <i>Nervous system</i>   |                                               |                                       |       |                     |       |
| Brain                   | Normal                                        | 10/10                                 | 10/10 | 10/10               | 10/10 |
| Spinal cord             | Normal                                        | 10/10                                 | 10/10 | 10/10               | 10/10 |
| Sciatic nerve           | Normal                                        | 10/10                                 | 10/10 | 10/10               | 10/10 |
| <i>Ocular system</i>    |                                               |                                       |       |                     |       |
| Eyes                    | Normal                                        | 6/10                                  | 4/10  | 4/10                | 4/10  |
|                         | Mild vacuolar optic nerve degeneration        | 4/10                                  | 6/10  | 5/10                | 6/10  |
|                         | Mild bilateral peripheral retina degeneration | -                                     | -     | 1/10                | -     |
| Haderian glands         | Normal                                        | 10/10                                 | 10/10 | 9/10                | 10/10 |
|                         | Cellular infiltration                         | -                                     | -     | 1/10                | -     |
| <i>Digestive system</i> |                                               |                                       |       |                     |       |
| Tongue/larynx           | Normal                                        | 10/10                                 | 10/10 | 10/10               | 10/10 |
| Salivary glands         | Normal                                        | 10/10                                 | 9/10  | 10/10               | 10/10 |
|                         | Mild hyperplasia                              | -                                     | 1/10  | -                   | -     |
| Esophagus               | Normal                                        | 10/10                                 | 10/10 | 10/10               | 10/10 |
| Stomach                 | Normal                                        | 7/10                                  | 4/10  | 4/10                | 6/10  |
|                         | Edema                                         | 1/10                                  | -     | 3/10                | 1/10  |
|                         | Mild glandular dilation                       | 3/10                                  | 3/10  | -                   | 1/10  |
|                         | Mild cellular infiltration                    | 2/10                                  | 4/10  | 5/10                | 3/10  |
| Duodenum                | Normal                                        | 10/10                                 | 10/10 | 10/10               | 10/10 |
| Jejunum                 | Normal                                        | 10/10                                 | 10/10 | 10/10               | 10/10 |
| Ileum                   | Normal                                        | 10/10                                 | 10/10 | 10/10               | 10/10 |
| Cecum                   | Normal                                        | 10/10                                 | 10/10 | 10/10               | 10/10 |
| Colon                   | Normal                                        | 10/10                                 | 10/10 | 10/10               | 10/10 |
| Rectum                  | Normal                                        | 7/10                                  | 7/10  | 10/10               | 9/10  |
|                         | Edema                                         | 3/10                                  | 3/10  |                     | 1/10  |
|                         | Focal inflammation                            | 10/10                                 | 10/10 | 10/10               | 10/10 |
|                         | Focal fatty change                            | 3/10                                  | 5/10  | 7/10                | 9/10  |
|                         | Diffuse fatty change                          | 1/10                                  | -     | -                   | -     |
|                         | Extramedullary hematopoiesis                  | 1/10                                  | -     | -                   | 4/10  |
|                         | Necrosis                                      | 2/10                                  | 6/10  | 2/10                | 1/10  |
| Apoptosis               | 2/10                                          | 1/10                                  | -     | -                   |       |
| Pancreas                | Normal                                        | 10/10                                 | 10/10 | 10/10               | 10/10 |
| <i>Immune system</i>    |                                               |                                       |       |                     |       |
| Thymus                  | Normal                                        | 10/10                                 | 10/10 | 9/9*                | 10/10 |
| Spleen                  | Normal                                        | 10/10                                 | 10/10 | 10/10               | 10/10 |
| Cervical lymph ln       | Normal                                        | 10/10                                 | 10/10 | 10/10               | 10/10 |
| Mesenteric lymph ln     | Normal                                        | 10/10                                 | 10/10 | 10/10               | 10/10 |

\*; Total number is reduced due to the loss during tissue preparation

Supplementary Table 4. Histopathological findings in major organs from SD rats orally treated with black ginseng extract for 28 days (continued)

| Organ                                    | Findings                                | Dose of black ginseng extract (mg/kg) |       |                     |       |
|------------------------------------------|-----------------------------------------|---------------------------------------|-------|---------------------|-------|
|                                          |                                         | Male (n=10/group)                     |       | Female (n=10/group) |       |
|                                          |                                         | 0                                     | 2000  | 0                   | 2000  |
| <i>Endocrine system</i>                  |                                         |                                       |       |                     |       |
| Pituitary gland                          | Normal                                  | 8/9*                                  | 8/10  | 10/10               | 9/9*  |
|                                          | Rathke's cleft dilation                 | 1/9*                                  | -     | -                   | -     |
|                                          | Calcification                           | -                                     | 1/10  | -                   | -     |
|                                          | Cyst                                    | -                                     | 1/10  | -                   | -     |
| Thyroid glands                           | Normal                                  | 6/10                                  | 9/10  | 8/10                | 4/10  |
|                                          | Keratinized cyst                        | 4/10                                  | 1/10  | 2/10                | 6/10  |
| Parathyroid glands                       | Normal                                  | 9/9*                                  | 8/8*  | 8/8*                | 8/8*  |
| Adrenal glands                           | Cortical vacuolization                  | 10/10                                 | 10/10 | 10/10               | 10/10 |
| <i>Respiratory system</i>                |                                         |                                       |       |                     |       |
| Nasal cavity                             | Normal                                  | 10/10                                 | 10/10 | 10/10               | 10/10 |
| Trachea                                  | Normal                                  | 10/10                                 | 10/10 | 10/10               | 10/10 |
| Lung                                     | Normal                                  | 10/10                                 | 9/10  | 10/10               | 9/10  |
|                                          | Hemorrhage                              | -                                     | 1/10  | -                   | -     |
|                                          | Inflammation                            | -                                     | -     | -                   | 1/10  |
| <i>Cardiovascular system</i>             |                                         |                                       |       |                     |       |
| Heart                                    | Normal                                  | 8/10                                  | 9/10  | 10/10               | 9/10  |
|                                          | Cardiomyopathy                          | 2/10                                  | 1/10  | -                   | 1/10  |
| <i>Urinary system</i>                    |                                         |                                       |       |                     |       |
| Kidneys                                  | Normal                                  | 7/10                                  | 9/10  | 5/10                | 6/10  |
|                                          | Chronic progressive nephropathy         | 1/10                                  | 1/10  | 2/10                | -     |
|                                          | Fibrosis                                | 2/10                                  | -     | 1/10                | -     |
|                                          | Mineralization                          | -                                     | -     | 2/10                | 4/10  |
| Urinary bladder                          | Normal                                  | -                                     | 1/10  | -                   | 1/10  |
|                                          | Dilation                                | 10/10                                 | 9/10  | 10/10               | 9/10  |
| <i>Reproductive system</i>               |                                         |                                       |       |                     |       |
| Preputial gland /Clitoral glands         | Normal                                  | 9/10                                  | 9/10  | 9/10                | 10/10 |
|                                          | Cellular infiltration                   | 1/10                                  | 1/10  | -                   | -     |
|                                          | Ductular dilation                       | -                                     | -     | 1/10                | -     |
| Testes                                   | Normal                                  | 10/10                                 | 10/10 | -                   | -     |
| Epididymides                             | Normal                                  | 10/10                                 | 10/10 | -                   | -     |
| Prostate                                 | Normal                                  | 6/10                                  | 7/10  | -                   | -     |
|                                          | Atrophy                                 | 1/10                                  | 1/10  | -                   | -     |
|                                          | Inflammation                            | 3/10                                  | 2/10  | -                   | -     |
| Seminal vesicle                          | Normal                                  | 10/10                                 | 10/10 | -                   | -     |
| Ovaries                                  | Normal                                  | -                                     | -     | 10/10               | 10/10 |
| Uterus                                   | Normal                                  | -                                     | -     | 8/10                | 10/10 |
|                                          | uterine endometrium squamous metaplasia | -                                     | -     | 2/10                | -     |
| Vagina                                   | Normal                                  | -                                     | -     | 10/10               | 10/10 |
| <i>Musculoskeletal and other systems</i> |                                         |                                       |       |                     |       |
| Skin/mammary gl.                         | Normal                                  | 10/10                                 | 10/10 | 9/10                | 10/10 |
|                                          | Follicular dilation                     | -                                     | -     | 1/10                | -     |
| Skeletal muscle                          | Normal                                  | 8/10                                  | 10/10 | 10/10               | 10/10 |
|                                          | Myofiber degeneration                   | 2/10                                  | -     | -                   | -     |
| Femur /bone marrow                       | Normal                                  | 10/10                                 | 10/10 | 10/10               | 10/10 |

\*; Total number is reduced due to the loss during tissue preparation
